# Supplementary material for: Measuring ligand-cell surface receptor affinities with axial line-scanning fluorescence correlation spectroscopy
Source: eLife. 2020 May 22;9:e55286. doi: 10.7554/eLife.55286 (PMC7289602; doi:10.7554/eLife.55286)
Supplement: Figure 2—source data 1. [file elife-55286-fig2-data1.xlsx]

## Sheet: Fig2
panel d															panel e
x	y	error	x	y	error	y	error								x	y	error	x	y	error
5.61009e-05	0.7779	0.02799	0.00224	0.16336	0.00138	0.7729	0.00692								2	0.3662	0.04729	1.2	0.11675	0.05274
6.29463e-05	0.7779	0.02799	0.00252	0.16336	0.00138	0.7729	0.00692								2.3	0.33555	0.048	1.5	0.09665	0.04007
7.06269e-05	0.7779	0.02799	0.00283	0.16336	0.00138	0.7729	0.00692								3	0.2449	0.02241	2	0.0736	0.02901
7.92447e-05	0.77688	0.02232	0.00317	0.15877	0.00375	0.75117	0.01877								4	0.1868	0.03103	3	0.05345	0.01213
8.8914e-05	0.77688	0.02232	0.00356	0.15877	0.00375	0.75117	0.01877								5	0.16455	0.02439	4	0.0516	0.01511
9.97631e-05	0.77688	0.02232	0.00399	0.15877	0.00375	0.75117	0.01877								7	0.0993	0.0105	5	0.03895	0.00274
0.000111936	0.77688	0.02232	0.00448	0.15877	0.00375	0.75117	0.01877								10	0.07485	0.00569	7	0.0356	0.00232
0.000125594	0.77505	0.02025	0.00502	0.15082	0.00191	0.71358	0.00954								15	0.0586	0.00595	10	0.03275	0.00208
0.000140919	0.77505	0.02025	0.00564	0.15082	0.00191	0.71358	0.00954								20	0.0478	0.00234	15	0.0303	0.0017
0.000158114	0.77505	0.02025	0.00632	0.15082	0.00191	0.71358	0.00954								30	0.0378	0.0023	20	0.0343	0.0034
0.000177407	0.76684	0.01996	0.0071	0.14967	0.00205	0.70813	0.01025								40	0.03395	0.00307	30	0.02505	0.00184
0.000199054	0.76684	0.01996	0.00796	0.14967	0.00205	0.70813	0.01025								50	0.01805	0.00665	40	0.0234	0.00157
0.000223342	0.76684	0.01996	0.00893	0.14967	0.00205	0.70813	0.01025								100	0.0199	0.000848331	50	0.0224	0.00141
0.000250594	0.7754	0.02318	0.01002	0.14561	0.0015	0.68891	0.00752								200	0.01435	0.00124	100	0.02135	0.00101
0.000281171	0.76601	0.02815	0.01125	0.14151	0.00181	0.66951	0.00903											200	0.01895	0.000693153
0.000315479	0.76601	0.02815	0.01262	0.14151	0.00181	0.66951	0.00903
0.000353973	0.7755	0.01587	0.01416	0.14202	0.000435396	0.67194	0.00218
0.000397164	0.78243	0.01208	0.01589	0.13813	0.000611422	0.6535	0.00306
0.000445625	0.75731	0.01425	0.01783	0.13677	0.00129	0.64708	0.00646
0.0005	0.75984	0.0215	0.02	0.13303	0.000101693	0.6294	0.000508464
0.000561009	0.7649	0.02548	0.02244	0.12859	0.00321	0.60838	0.01607
0.000629463	0.76127	0.01627	0.02518	0.12905	0.000476961	0.61057	0.00238
0.000706269	0.75481	0.01638	0.02825	0.1258	0.00107	0.59519	0.00533
0.000792447	0.75821	0.0102	0.0317	0.12153	0.00105	0.57498	0.00527
0.00088914	0.76564	0.02344	0.03557	0.11969	0.000807737	0.56628	0.00404
0.000997631	0.75279	0.02709	0.03991	0.11714	0.000342454	0.5542	0.00171
0.00112	0.7428	0.00531	0.04477	0.11074	0.00021892	0.52395	0.00109
0.00126	0.75948	0.0305	0.05024	0.10819	0.000278002	0.51189	0.00139
0.00141	0.7397	0.02522	0.05637	0.10589	0.00249	0.50097	0.01245
0.00158	0.75133	0.01983	0.06325	0.1005	0.00194	0.47547	0.0097
0.00177	0.73567	0.01107	0.07096	0.09863	0.00102	0.46663	0.00511
0.00199	0.74835	0.02333	0.07962	0.09337	0.00164	0.44175	0.0082
0.00223	0.72141	0.01863	0.08934	0.08846	0.000957303	0.41852	0.00479
0.00251	0.7298	0.01393	0.10024	0.08562	0.00138	0.40509	0.00692
0.00281	0.72229	0.01971	0.11247	0.08168	0.00176	0.38647	0.0088
0.00315	0.72103	0.01965	0.12619	0.07657	0.00165	0.36224	0.00823
0.00354	0.72298	0.0262	0.14159	0.07302	0.00531	0.34547	0.02657
0.00397	0.68745	0.01032	0.15887	0.06951	0.00602	0.32888	0.03011
0.00446	0.6849	0.00669	0.17825	0.0678	0.00090018	0.32076	0.0045
0.005	0.68446	0.01797	0.2	0.05922	0.00143	0.28019	0.00715
0.00561	0.6741	0.01509	0.2244	0.06079	0.00491	0.28761	0.02456
0.00629	0.67696	0.02371	0.25179	0.05669	0.00376	0.2682	0.01878
0.00706	0.65996	0.01277	0.28251	0.05592	0.00292	0.26457	0.01462
0.00792	0.64269	0.01156	0.31698	0.04921	0.00308	0.2328	0.01542
0.00889	0.62857	0.01112	0.35566	0.04666	0.00187	0.22076	0.00937
0.00998	0.62528	0.02639	0.39905	0.03978	0.0035	0.18819	0.01749
0.01119	0.61029	0.01255	0.44774	0.03405	0.0046	0.16111	0.02301
0.01256	0.58256	0.00901	0.50238	0.03272	0.00423	0.15482	0.02113
0.01409	0.57535	0.01096	0.56368	0.03052	0.00555	0.14441	0.02773
0.01581	0.55733	0.01492	0.63246	0.02899	0.0036	0.13714	0.01802
0.01774	0.54573	0.01267	0.70963	0.02584	0.00353	0.12225	0.01766
0.01991	0.51872	0.01573	0.79621	0.02576	0.00264	0.12189	0.0132
0.02233	0.51373	0.02156	0.89337	0.01784	0.00295	0.08439	0.01474
0.02506	0.48694	0.0115	1.00237	0.02146	0.00106	0.10151	0.00529
0.02812	0.44123	0.01319	1.12468	0.02035	0.00267	0.0963	0.01335
0.03155	0.43654	0.00961	1.26191	0.01547	0.00242	0.07319	0.01211
0.0354	0.40228	0.00467	1.41589	0.01383	0.00068705	0.06545	0.00344
0.03972	0.39108	0.01337	1.58866	0.00911	0.00287	0.04312	0.01433
0.04456	0.35684	0.0058	1.7825	0.01127	0.00106	0.05334	0.0053
0.05	0.32536	0.00573	2	0.00847	0.00187	0.04009	0.00934
0.0561	0.31128	0.00367	2.24404	0.00357	0.00216	0.01691	0.01079
0.06295	0.2813	0.00392	2.51785	0.0084	0.00116	0.03974	0.00578
0.07063	0.26868	0.00993	2.82508	0.00823	0.00114	0.03894	0.00571
0.07924	0.25345	0.01282	3.16979	0.00469	0.000952607	0.02218	0.00476
0.08891	0.21722	0.000326303	3.55656	0.000726868	0.00234	0.00344	0.01171
0.09976	0.20372	0.01871	3.99052	0.00365	0.00316	0.01726	0.01582
0.11194	0.18511	0.02224	4.47744	0.00461	0.00361	0.02182	0.01804
0.12559	0.15665	0.02588	5.02377	0.00206	0.0053	0.00976	0.02652
0.14092	0.12976	0.01739	5.63677	0.000998433	0.00502	0.00472	0.02508
0.15811	0.13745	0.01577	6.32456	0.00592	0.0063	0.02802	0.03151
0.17741	0.10873	0.00578	7.09627	0.00588	0.00875	0.02784	0.04373
0.19905	0.10301	0.00248	7.96214	0.01048	0.00338	0.0496	0.01692
0.22334	0.09287	0.00413	8.93367	0.00239	0.00592	0.01131	0.02961
0.25059	0.07747	0.01477	10.0237	0.00595	0.002	0.02814	0.01002
0.28117	0.06782	0.00443	11.2468	0.00817	0.00138	0.03866	0.0069
0.31548	0.05871	0.01097	12.6191	0.00325	0.00501	0.01537	0.02504
0.35397	0.05233	0.00717	14.1589	0.00131	0.00252	0.00617	0.01261
0.39716	0.05068	0.00475	15.8866	0.000724925	0.00419	0.00343	0.02096
0.44563	0.04032	0.0116	17.825	0.00636	0.00995	0.03007	0.04977
0.5	0.0356	0.01004	20	0.00855	0.01089	0.04046	0.05443
0.56101	0.01685	0.00282	22.4404	0.01096	0.00847	0.05185	0.04236
0.62946	0.02372	0.00713	25.1785	0.01053	0.01463	0.0498	0.07317
0.70627	-0.01219	0.01001	28.2508	0.00717	0.01139	0.03393	0.05694
0.79245	0.01228	0.00191	31.6979	0.000249237	0.00269	0.00118	0.01346
0.88914	0.02107	0.00344	35.5656	-0.00299	0.00734	-0.01414	0.03669
0.99763	0.01591	0.0046	39.9053	0.000877674	0.00322	0.00415	0.01612
1.11936	0.00483	0.00387	44.7744	-0.00508	0.00724	-0.02404	0.03621
1.25594	0.01207	0.00247	50.2377	0.00471	0.000985607	0.02228	0.00493
1.40919	-0.0079	0.00759	56.3677	0.00499	0.00839	0.02361	0.04196
1.58114	-0.01047	0.00492	63.2456	0.00747	0.01178	0.03535	0.05892
1.77407	-0.00479	0.00945	70.9627	0.00983	0.01745	0.04651	0.08723
1.99054	-0.00135	0.00874	79.6214	0.00633	0.00864	0.02994	0.04322
2.23342	-0.00825	0.00244	89.3367	-0.0027	0.00643	-0.01277	0.03216
2.50594	0.01128	0.00722	100.237	-0.01212	0.01131	-0.05734	0.05657
2.81171	0.00421	0.00659	112.468	-0.01099	0.0063	-0.05201	0.03151
3.15479	-0.00684	0.00221	126.191	-0.00926	0.01396	-0.0438	0.06981
3.53973	0.00711	0.00166	141.589	0.01264	0.01455	0.05978	0.07277
3.97164	-0.00356	0.01398	158.866	-0.00635	0.01583	-0.03006	0.07917
4.45625	0.00951	0.02932	178.25	0.00627	0.01438	0.02967	0.07191
5	0.00878	0.01135	200	0.03973	0.10581	0.18798	0.52905
5.61009	0.00344	0.00213		--	--	--	0
6.29463	0.01221	0.00285		--	--	--	0
7.06269	-0.000236679	0.00857		--	--	--	0
7.92447	0.00354	0.03191		--	--	--	0
8.8914	-0.00628	0.00654		--	--	--	0
9.97631	0.01951	0.00143		--	--	--	0
11.1936	0.01071	0.000312557		--	--	--	0
12.5594	-0.01281	0.01336		--	--	--	0
14.0919	0.01346	0.0139		--	--	--	0
15.8114	0.00294	0.01175		--	--	--	0
17.7407	0.02182	0.01486		--	--	--	0
19.9054	0.01448	0.02762		--	--	--	0
22.3342	-0.00807	0.000403979		--	--	--	0
25.0594	-0.00162	0.000854993		--	--	--	0
28.1171	0.01763	0.01299		--	--	--	0
31.5479	0.02148	0.02324		--	--	--	0
35.3973	0.017	0.02993		--	--	--	0
39.7164	0.01822	0.0182		--	--	--	0
44.5626	0.00449	0.01861		--	--	--	0
50	0.00512	0.01764		--	--	--	0
56.1009	0.02633	0.07037		--	--	--	0
62.9463	0.0016	0.00307		--	--	--	0
70.6269	0.0267	0.00255		--	--	--	0
79.2447	0.03477	0.09117		--	--	--	0
88.914	0.025	0.01195		--	--	--	0
99.7631	0.01	0.01195		--	--	--	0
				--	--	--	0
				--	--	--	0
				--	--	--	0
				--	--	--	0
				--	--	--	0
				--	--	--	0
				--	--	--	0
				--	--	--	0
				--	--	--	0
				--	--	--	0
				--	--	--	0
				--	--	--	0
				--	--	--	0
				--	--	--	0
