# Supplementary material for: Measuring ligand-cell surface receptor affinities with axial line-scanning fluorescence correlation spectroscopy
Source: eLife. 2020 May 22;9:e55286. doi: 10.7554/eLife.55286 (PMC7289602; doi:10.7554/eLife.55286)
Supplement: Figure 5—source data 1. [file elife-55286-fig5-data1.xlsx]

## Sheet: Fig4
panel a						panel b						panel c						panel d						panel e			panel f
conc	y	error				conc	y	error				conc	y	error				conc	y	error				gamma(t)	gamma(t)		gamma(t)	gamma(t)
0.01456	0.0933	0.02513				0.01456	0.0552	0.0172				0.01456	0.13875	0.05772				0.01456	0.06552	0.05579				--	--
0.07282	0.194	0.0138				0.07282	0.12485	0.01				0.07282	0.3972	0.0317				0.07282	0.33167	0.03243				--	--
0.29129	0.33	0.02748				0.29129	0.19235	0.031				0.14564	0.73673	0.06313				0.29129	0.58819	0.10054				1.68452	1.43719		--	--
0.58258	0.375	0.0307				0.58258	0.25	0.015				0.29129	0.84907	0.07053				0.58258	0.78954	0.04865				2.0653	1.33273		1.4381	1.6569
1.45644	0.4325	0.02701				1.45644	0.29965	0.015				0.58258	0.98805	0.06206				1.45644	0.96222	0.04865				1.7	1.48		1.4175	1.2695
2.91288	0.3945	0.0444				2.91288	0.25885	0.032				1.31079	0.90351	0.102				2.91288	0.8345	0.10379				--	--		1.2841	1.471
7.28219	0.404	0.03539				7.28219	0.2889	0.03				7.28219	0.92695	0.08131				7.28219	0.93493	0.0973				--	--		1.5889	1.6862
																								1.53791	1.46578		1.689	1.9685
																								1.61973	1.44986		--	--
																								1.59	1.69		1.7676	1.8943
																								--	--		1.4467	1.4438
																								--	--		1.6977	1.4363
																								1.44993	1.26216		1.8589	1.9169
																								1.53212	1.12291		1.4727	1.2842
																								1.42	1.27		1.3294	1.3121
																								--	--		--	--
																								--	--		1.508	1.5309
																								2.51194	1.98251		1.5858	2
																								1.69	1.97		1.4337	1.5084
																								--	--		1.4526	1.9303
																								--	--		1.6385	1.6568
																								--	--		1.591	1.5923
																								1.24275	1.50989		1.49	1.4736
																								1.36571	1.64427		--	--
																								1.28	1.47		1.6947	1.8576
																								--	--		1.6102	1.6551
																								--	--		1.1628	1.4176
																								--	--		1.5597	1.7687
																								3.38101	2.1135		1.542	1.511
																								1.86	1.92		1.5864	1.7259
																								--	--		--	--
																								--	--		1.8995	1.8419
																								1.46854	1.47132		1.3001	1.4382
																								1.7919	1.4321		1.3925	1.3876
																								1.45	1.44		1.3011	1.4913
																								--	--		1.383	1.7992
																								--	--		1.4819	1.1338
																								1.57761	1.26814		--	--
																								1.47	1.28		--	--
																								--	--		--	--
																								--	--		--	--
																								--	--		--	--
																								2.00793	1.57135		1.4192	1.7289
																								1.7	1.43		1.2298	1.3718
																								--	--		1.7896	1.3444
																								--	--		--	--
																								--	--		--	--
																								--	--		1.3233	1.2398
																								1.6615	1.6034		--	--
																								1.65856	1.58283		1.2211	1.4766
																								1.51	1.53		1.3242	1.3865
																								--	--		1.4731	1.6785
																								--	--		--	--
																								1.58108	2.03323		--	--
																								2.01315	2.59049		1.3524	1.521
																								--	--		1.4621	1.6678
																								--	--		1.8142	1.5849
																								--	--		1.4753	1.8107
																								--	--		--	--
																								1.34977	1.47722		1.0898	1.2018
																								1.48942	1.59267		1.0898	1.2018
																								1.433	1.51		1.5832	1.8128
																								--	--		1.4883	1.7051
																								--	--		--	--
																								1.52683	1.68461		1.0325	1.3371
																								1.59005	1.63948		1.5757	1.8144
																								1.45	1.93		1.4	1.5572
																								--	--		1.1162	1.9755
																								--	--		--	--
																								--	--		1.4014	1.5672
																								1.1416	1.53523		1.6	1.27
																								1.32794	1.7737		1.4	1.9
																								1.69	1.86		1.9586	1.7403
																								--	--		--	--
																								--	--		1.29	1.2
																								1.59256	1.57665		1.1584	1.3677
																								1.99793	1.81645		1.6081	1.285
																								1.61	1.66		1.1998	1.3778
																								--	--
																								--	--
																								1.17097	1.39095
																								1.17558	1.43143
																								--	--
																								--	--
																								--	--
																								1.53812	1.74707
																								1.7012	2.09756
																								1.77	1.56
																								--	--
																								--	--
																								1.85921	1.70745
																								2.2286	2.12987
																								1.9	1.84
																								--	--
																								--	--
																								1.63017	1.79236
																								--	--
																								--	--
																								1.28896	1.42532
																								1.41864	1.85188
																								1.3	1.44
																								--	--
																								--	--
																								1.53099	2.24531
																								1.38	1.8
																								--	--
																								--	--
																								1.34266	1.29043
																								1.39387	1.27573
																								1.39	1.39
																								--	--
																								--	--
																								1.06855	1.25057
																								1.48	1.13
																								--	--
																								--	--
																								1.34203	1.66773
																								1.3	1.49
																								--	--
																								--	--
																								--	--
																								--	--
																								--	--
																								--	--
																								1.682	1.3131
																								--	--
																								1.4142	1.8952
																								--	--
																								1.32586	1.22765
																								--	--
																								--	--
																								--	--
																								--	--
																								1.84046	1.56369
																								2	3
																								--	--
																								--	--
																								2.89291	3.23587
																								2	1.35
																								--	--
																								--	--
																								1.55149	1.65841
																								--	--
																								--	--
																								--	--
																								2.38386	1.81622
																								0.68	0.78
																								--	--
																								--	--
																								1.3619	1.64198
																								1.75	2.6
																								--	--
																								--	--
																								1.3518	1.47925
																								1.8	2.8
																								--	--
																								--	--
																								--	--
																								2.11622	1.76121
																								1.3	1.8
																								--	--
																								--	--
																								1.36711	1.98784
																								1.4	1.8
																								--	--
																								--	--
																								1.90176	1.83289
																								1.65	2.8
																								--	--
																								--	--
																								1.7908	1.67832
																								1.7	1.9
																								--	--
																								--	--
																								1.78113	2.16327
																								1.4	2
																								--	--
																								--	--
																								1.23181	1.59893
																								1.27	1.45
																								--	--
																								--	--
																								2.00068	2.53645
																								2.1	1.9
																								--	--
																								--	--
																								1.02825	1.1465
																								1.22	1.39
																								--	--
																								--	--
																								1.36705	2.04401
																								1.43	1.6
																								--	--
																								--	--
																								1.58388	1.97978
																								1.42	1.55
																								--	--
																								--	--
																								0.8863	0.99596
																								1.01	1.05
																								--	--
																								--	--
																								--	--
																								--	--
																								--	--
																								1.9751	1.21024
																								--	--
																								2.4828	0.6726
																								--	--
																								1.32227	1.26427
																								--	--
																								--	--
																								--	--
																								1.4304	1.5685
																								--	--
																								1.22458	1.34896
																								1.22	1.48
																								--	--
																								--	--
																								2.14526	2.40078
																								1.74	1.92
																								--	--
																								--	--
																								1.27389	1.12435
																								1.32	1.38
																								--	--
																								--	--
																								1.23622	1.27802
																								1.47	1.67
																								--	--
																								--	--
																								1.7663	2.0162
																								3.5	0.7
																								--	--
																								--	--
																								1.56472	1.42142
																								1.69	1.5
																								--	--
																								--	--
																								1.041	1.0986
																								1.16	1.35
																								--	--
																								--	--
																								--	--
																								1.40529	1.67561
																								1.35	1.52
																								--	--
																								--	--
																								1.50179	2.03418
																								1.46	1.67
																								--	--
																								--	--
																								1.89453	1.44934
																								1.81	1.58
																								--	--
																								--	--
																								1.27843	1.48181
																								1.47	1.81
																								3.39872	3.34977
																								1.70192	2.13334
																								--	--
																								1.37274	1.45793
																								1.1	1.2
																								--	--
																								--	--
																								2.68964	3.44877
																								2.48	2.17
																								--	--
																								--	--
																								1.15847	1.34626
																								0.79	1.1
																								--	--
																								--	--
																								2.61825	1.94274
																								2.6	1.8
																								--	--
																								--	--
																								2.4988	2.7152
																								1.68	1.62
																								--	--
																								--	--
																								1.78168	2.31898
																								1.48	1.7
																								--	--
																								--	--
																								1.57911	2.08292
																								1	1.3
																								--	--
																								--	--
																								1.51768	1.87983
																								1.58	1.81
																								--	--
																								--	--
																								1.40849	1.61408
																								1.4	1.55
																								--	--
																								--	--
																								2.59943	2.62565
																								2.1	1.97
																								--	--
																								--	--
																								1.09678	1.40848
																								1.27	1.6
																								--	--
																								--	--
																								3.29506	2.08181
																								3.7	2.4
																								--	--
																								--	--
																								1.63482	2.29038
																								1.9	2.4
																								--	--
																								--	--
																								2.13967	2.19987
																								2.4	2.3
																								--	--
																								--	--
																								2.17334	2.23287
																								1.9	1.8
																								--	--
																								--	--
																								1.96622	1.71874
																								1.95	1.74
																								--	--
																								--	--
																								1.38199	1.53893
																								1.4	1.57
																								--	--
																								--	--
																								--	--
																								--	--
																								--	--
																								2.37724	2.51855
																								--	--
																								--	--
																								--	--
																								1.19487	1.5708
																								--	--
																								--	--
																								--	--
																								1.14926	1.4022
																								--	--
																								--	--
																								--	--
																								--	--
																								--	--
																								--	--
