# Supplementary material for: Measuring ligand-cell surface receptor affinities with axial line-scanning fluorescence correlation spectroscopy
Source: eLife. 2020 May 22;9:e55286. doi: 10.7554/eLife.55286 (PMC7289602; doi:10.7554/eLife.55286)
Supplement: Figure 6—source data 1. [file elife-55286-fig6-data1.xlsx]

## Sheet: Fig5
panel a									panel b	1703	stable		crispr		transient			Hek	SNAP		eGFP
density	density	density	density	density						conc	y	error	y	error	conc	y	error	conc	y	error	y	error
17.3869	--	77.1769	818.853	961.317						0.01456	0.13875	0.05772	0.10758	0.08108	0.02039	0.06151	0.07611	0.03	0.11908	0.03386	0.09086	0.02623
14.9322	--	646.21	491.393	302.304						0.07282	0.3972	0.0317	0.34371	0.07294	0.05098	0.10396	0.04198	0.07			0.12847	0.01825
19.5725	32.2045	298.285	431.675	1326.81						0.29129	0.73673	0.06313	0.55731	0.06475	0.10195	0.28463	0.08941	0.1	0.15965	0.0352
30.0336	--	67.916	586.634	638.615						0.58258	0.84907	0.07053	0.7668	0.10054	0.30585	0.53069	0.03169	0.2			0.28201	0.06038
32.016	--	380.187	702.188	920.906						1.45644	0.98805	0.06206	0.85088	0.09035	1.01951	0.80108	0.12321	0.3	0.49262	0.08841
20.9845	--	--	344.622	819.257						2.91288	0.90351	0.102	0.93992	0.09347	2.03901	0.88236	0.05221	0.45			0.52814	0.1183
--	--	611.594	498.536	1573.7						7.28219	0.92695	0.08131	0.93953	0.10016	5.09753	0.99248	0.06542	0.7			0.57913	0.11304
9.04432	81.2068	380.292	163.528	923.3											10.1951	0.94411	0.08532	1	0.55086	0.06794
17.709	--	190.912	314.541	1362.44														2			0.75087	0.08153
--	--	234.494	393.114	490.907														3	0.8275	0.13369
14.4348	--	402.097	345.58	--														7			1.05376	0.1415
--	--	445.726	--	--														10	1.01152	0.07543
5.45793	28.2276	--	--	--														20			0.99844	0.1527
--	--	353.59	--	--														30	0.99798	0.12425
18.3614	--	169.842	370.007	681.685
--	--	165.452	402.338	1191.4
46.2613	--	180.153	861.555	1041.66
12.8045	--	--	355.461	959.462
13.4452	55.5622	86.8153	472.26	1089.11
11.5858	--	214.531	504.299	1139.79
8.33699	--	137.753	341.78	2519.2
7.68942	--	426.214	470.028	1743.65
14.7246	25.6637	336.592	399.109	658.923
--	--	--	640.259	778.23
19.7718	--	363.21	710.819	--
6.90318	--	266.96	270.56	--
14.9535	--	384.251	322.915	--
30.0221	--	366.141	253.849	--
16.4841	--	427.8	652.782	--
21.0329	36.5495	--	403.317	--
18.5975	--	131.814	305.273	--
--	--	110.17	275.354	--
27.8391	26.5337	235.449	369.732	--
24.5868	--	434.003	--	--
39.7404	--	270.091	--	--
9.06663	--	241.693	--	--
15.7954	--	--	429.809	740.785
14.0425	56.1262	278.567	483.744	1508.31
--	--	101.552	511.983	792.493
--	--	103.466	185.072	718.522
--	--	91.8492	523.297	1881.53
18.1554	--	67.0498	189.588	1147.68
--	--	141.801	1177.02	1532.48
20.6456	48.3871	--	364.849	1807.67
10.9429	--	178.344	382.825	652.696
11.3335	--	101.164	145.194	361.665
18.6586	--	82.4863	1587.26	1813.6
10.3359	--	268.474	1021.34	--
--	24.868	145.596	552.912	--
9.5671	--	--	321.454	--
11.7055	--	132.217	356.992	--
31.1479	--	114.538	235.014	--
14.9157	--	100.206	--	--
--	33.1058	90.6772	--	--
--	--	102.294	--	--
9.23884	--	90.1718	490.907	1567.25
29.1763	--	103.702	139.297	1734.53
27.6115	--	--	377.02	598.351
11.3453	--	46.5872	359.833	814.828
7.81205	27.2016	57.6007	703.678	1376.77
--	--	182.089	440.859	1152.2
9.03047	--	94.6916	254.759	2237.02
10.0338	--	--	368.09	2306.54
12.946	--	363.341	442.035	3928.04
7.29526	43.9539	495.657	896.825	1647.2
--	--	373.283	898.283	1044.94
--	--	84.4929	800.788	897.31
--	--	133.942	1024.92	--
--	--	141.865	588.787	--
11.7129	--	--	300.659	--
8.08053	40.1366	382.724	417.89	--
8.9264	--	253.397	241.99	--
--	--	160.9	--	--
18.3078	--	227.263	--	--
6.07251	--	141.752	--	--
8.06531	37.5212	99.098	89.5855	722.384
6.67363	--	--	964.487	738.366
--	--	173.816	571.531	2720.4
10.2351	--	203.106	632.684	2178.23
--	--	196.668	172.61	2752.02
9.99457	22.2283	75.3121	163.367	1484
19.5946	--	115.204	64.7681	1195.98
16.7105	--	--	98.8647	--
6.53681	--	49.8507	884.384	--
45.2254	--	69.0762	285.143	--
--	32.5855	83.4175	102.746	--
--	--	87.0489	47.8163	--
25.4266	--	171.398	200.197	--
33.1349	--	43.6406	293.906	--
32.4259	--	--	272.786	--
14.8953	51.4983	160.53	--	--
21.4818	--	53.2236	--	--
28.2628	--	166.07	--	--
40.3243	--	161.78	258.064	501.249
34.4818	--	105.849	88.6276	1844.54
--	72.4233	--	521.596	528.919
19.3944	--	109.198	651.926	944.34
41.0723	--	105.189	363.781	1652.67
30.2792	22.552	48.6736	475.875	595.556
43.3444	--	914.84	155.939	827.024
38.3795	--	117.635	330.425	405.619
--	--	--	660.235	303.04
29.3881	--	266.512	271.298	243.65
40.9073	31.2143	74.1774	206.002	2077.23
27.7244	--	131.842	183.029	2002.78
27.9987	--	115.61	274.291	595.77
26.5258	--	--	293.386	--
43.0513	23.8157	123.709	565.423	--
27.5146	--	103.735	269.826	--
45.2306	--	178.833	694.053	--
	--	1068.36	361.14	--
	--	126.936	--	--
	29.5002	--	--	--
	--	194.685	--	--
	--	211.804	109.68	1111.26
	--	300.613	757.37	290.134
	31.7497	166.631	248.769	743.221
	--	165.954	299.211	2178.23
	--	133.904	188.439	1599.52
	--	214.817	647.259	1555.49
	--	--	240.818	2205.27
	--	371.828	173.392	973.55
	--	344.314	286.292	761.546
	--	310.348	371.666	1763.44
	47.1134	269.381		1902.41
	--	69.3113		1377.91
	--	109.46		1934.23
	--	--		--
	--	262.541		--
	--	41.6873		--
	--	539.148		1316.97
	--	64.5517		1957.06
	--	112.266		832.98
	124.636	107.949		547.917
	--	--		482.337
	--	289.161		447.203
	--	344.368		841.152
	37.2716	40.3534		1008.29
	--	344.019		1214.09
	--	176.155		806.633
	--	--
	200.369	169.659
	--	213.391
	--	246.846
	--	89.4379
	84.5924	198.319
	--	156.244
	--	--
	--	73.6719
	158.268	47.8301
	--	70.3387
	--	37.0612
	--	36.5977
	129.234	--
	--	--
	--	60.493
	--	68.8638
	--	57.877
	62.2706	42.5373
	--	115.747
	--	47.1539
	--	35.6011
	157.225	54.9397
	--	101.964
	--	--
	--	269.572
	76.13	337.599
	--	213.461
	--	282.325
	--	263.279
	190.123	274.783
	--	58.8852
	--	77.4425
	--	--
	76.6392	254.669
	--	566.768
	--	604.705
	--	304.259
	62.4432	428.072
	--	102.808
	--	278.697
	--	277.648
	62.3986	302.718
	--	230.818
	--	--
	--	99.5555
	77.0833	55.9398
	--	58.1324
	--	125.638
	--	138.569
	153.473	57.4327
	--	118.534
	--	232.048
	--	43.9937
	73.9735	--
	--	72.3994
	--	35.151
	--	62.666
	112.459	288.886
	--	76.8129
	--	78.9927
	--	63.198
	--	169.839
	--	--
	--	51.8351
	--	27.4048
	--	157.464
	--	80.6707
	--	548.522
	206.254	49.1511
	--	112.7
	--	--
	--	420.107
	119.834	84.6925
	--	38.9174
	64.1779	137.254
	--	350.566
	--	63.8097
	--	39.6957
	34.9553	167.86
	--	--
	--	--
	--	193.244
	26.8065	140.796
	--	50.8697
	--	66.9359
	--	83.9014
	50.1174	81.4065
	--	--
	--	60.5078
	--	56.398
	50.177	71.099
	--	47.1055
	--	--
	--	184.397
	27.4804	190.039
	--	248.87
	--	53.9461
	--	--
	25.8186	43.4663
	--	14.9837
	--	98.2387
	--	37.7452
	--	26.3362
	40.8211	--
	--	38.6144
	--	192.706
	--	21.1065
	31.7874	71.9698
	--	96.0393
	--	276.177
	--	681.661
	28.3011	95.8095
	--	76.731
	--	78.5413
	--	71.3381
	47.8548	76.1778
	--	--
	--	147.437
	--	178.343
	--	67.074
	38.8668	221.899
	--	75.4793
	--	142.308
	--	--
	31.2382	233.638
	--	193.325
	--	238.655
	--	269.584
	--	269.997
	--	345.184
	--	107.065
	--	174.957
	43.8681	131.156
	--	130.859
	--	233.768
	--	--
	36.4812	114.575
	--	280.713
	--	44.7319
	--	215.226
	36.294	27.6795
	--	220.983
	--	84.0554
	--	379.36
	42.4413	211.901
	--	229.208
	--	77.8773
	--	--
	94.0031	196.292
	--	107.89
	--	30.1519
	--	122.566
	83.5381	155.474
	--	390.795
	--	492.305
	--	--
	133.712	176.395
	--	134.418
	--	177.567
	--	115.761
	40.3147	120.617
	--	248.783
	--	171.376
	--	--
	28.4059	216.022
	--	98.9939
	--	101.382
	--	58.3691
	60.9736	206.393
	--	42.9945
	--	67.4963
	--	13.6739
	30.2106	--
	--	346.236
	--	675.138
	--	96.2209
	91.322	148.566
	--	34.1865
	--	106.228
	--	144.934
	165.011	36.0348
	--	47.7609
	--	--
	--	--
	44.2685	126.926
	--	75.0717
	--	79.4617
	--	144.509
	--	141.776
	--	--
	--	22.5719
	29.9176	227.765
	--	361.467
	--	287.908
	--	473.643
	--	488.474
	--	94.4904
	--	84.3471
	--	--
	56.1488	318.812
	--	233.949
	--	175.901
	--	170.053
	--	146.888
	--	--
	--	1104.71
		585.487
		46.1485
		--
		--
		111.913
		194.095
		166.175
		349.806
		98.2931
		--
		204.819
		320.374
		27.7803
		118.889
		84.7647
		151.35
