# Supplementary material for: Measuring ligand-cell surface receptor affinities with axial line-scanning fluorescence correlation spectroscopy
Source: eLife. 2020 May 22;9:e55286. doi: 10.7554/eLife.55286 (PMC7289602; doi:10.7554/eLife.55286)
Supplement: Figure 7—source data 1. [file elife-55286-fig7-data1.xlsx]

## Sheet: Fig6
panel a			panel b
density	density		conc	y	eerror	conc	y	error
52.131	19.5164		1e-05	--	--	--	--	--
6.15154	81.5043		0.00146	--	--	--	--	--
18.7292	62.8494		0.00146	--	--	--	--	--
21.3435	38.6618		0.000145644	--	--	1e-05	--	--
49.7348	22.4714		0.00146	--	--	0.43693	0.45087	0.09305
166.048	--		0.00146	--	--	1.45644	--	--
42.5457	75.6151		0.00146	--	--	1.45644	--	--
--	49.2905		0.00146	--	--	1.45644	--	--
1.11587	71.7215		0.00146	--	--	1.45644	--	--
3.92494	45.8346		0.00146	--	--	1.45644	--	--
13.5587	74.3191		0.00146	--	--	1.45644	--	--
15.6619	26.8358		0.00146	--	--	10.1951	0.92148	0.2515
5.39351	20.1248		0.00146	--	--	10.1951	--	--
25.3662	44.9565		0.43693	--	--	10.1951	--	--
25.0201	--		0.43693	--	--	10.1951	--	--
--	43.9032		0.43693	--	--	10.1951	--	--
111.637	346.696		1.45644	0.1972	0.06527	10.1951	--	--
104.247	1.13927		1.45644	--	--	20.3901	--	--
41.9604	56.6893		1.45644	--	--	20.3901	--	--
31.6681	2.66745		1.45644	--	--	20.3901	--	--
25.3505	1.43586		1.45644	--	--	20.3901	--	--
--	--		4.36931	0.23276	0.07562	20.3901	--	--
39.4316	83.8685		4.36931	--	--	20.3901	--	--
17.3936	67.4616		4.36931	--	--	48.0624	1.07393	0.22038
37.7242	24.8925		4.6606	--	--	48.0624	--	--
70.8733	75.6486		4.6606	--	--	48.0624	--	--
25.0928	74.7749		4.6606	--	--	48.0624	--	--
108.055	41.7934		4.6606	--	--	48.0624	--	--
22.3656	28.3958		4.6606	--	--	48.0624	--	--
63.1392	15.5946		4.6606	--	--	218.466	1.00047	0.14044
--	13.6211		4.6606	--	--	218.466	--	--
77.5617	80.115		7.28219	--	--	218.466	--	--
149.543	424.554		7.28219	--	--	218.466	--	--
111.095	106.758		7.28219	--	--	218.466	--	--
53.6336	--		7.28219	--	--	218.466	--	--
47.9654	23.1887		7.28219	--	--	0.07282	0.13981	0.06193
142.442	24.3014		8.73862	0.48916	0.12241	0.07282	--	--
111.531	41.1978		10.1951	--	--	0.07282	--	--
22.6313	15.1282		10.1951	--	--	0.07282	--	--
62.9157	20.8052		10.1951	--	--	0.07282	--	--
25.1437	13.4663		10.1951	--	--	0.07282	--	--
--	--		10.1951	--	--	0.07282	--	--
788.289	109.907		10.1951	--	--	0.07282	--	--
256.815	538.4		10.1951	--	--	0.07282	--	--
30.4173	199.69		15.5839	0.61281	0.17438	0.07282	--	--
33.3484	117.783		15.5839	--	--	0.14564	0.17504	0.07314
--	96.3824		15.5839	--	--	0.14564	--	--
19.5164	106.222		15.5839	--	--	0.14564	--	--
81.5043	--		15.4382	--	--	0.14564	--	--
62.8494	--		15.4382	--	--	0.14564	--	--
38.6618	--		15.4382	--	--	0.14564	--	--
22.4714	7.45376		15.4382	--	--	0.14564	--	--
116.453	36.1772		37.8674	0.87562	0.16034	0.14564	--	--
--	33.1896		37.8674	--	--	0.29129	0.42449	0.11675
43.3543	17.3787		37.8674	--	--	0.29129	--	--
20.8448	14.725		37.8674	--	--	0.29129	--	--
204.442	27.0003		46.606	--	--	0.29129	--	--
27.1209	33.7893		46.606	--	--	0.29129	--	--
42.4287	2.12472		46.606	--	--	0.29129	--	--
18.4061	104.556		46.606	--	--	0.29129	--	--
39.4718	36.1226		46.606	--	--	0.29129	--	--
28.4427	--		46.606	--	--	0.29129	--	--
5.97257	87.3226		46.606	--	--	0.87386	0.59858	0.11864
64.108	67.5833		46.606	--	--	0.87386	--	--
--	54.6362		46.606	--	--	0.87386	--	--
5.60312	189.728		46.606	--	--	0.87386	--	--
126.392	104.92		65.5397	0.86823	0.28054	0.87386	--	--
339.984	9.94194		65.5397	--	--	0.87386	--	--
18.848	4.93988		65.5397	--	--	0.87386	--	--
278.476	25.3675		65.5397	--	--	0.87386	--	--
--	--		139.818	0.87734	0.35911	1.45644	0.77725	0.22796
9.21391	55.8082		139.818	--	--	1.45644	--	--
1.70236	108.296		139.818	--	--	1.45644	--	--
38.8978	42.3558		139.818	--	--	1.45644	--	--
14.2367	88.7621		218.466	0.99581	0.29581
8.63335	29.5924		218.466	--	--
--	36.8285		218.466	--	--
7.45059	12.3469		218.466	--	--
95.9284	163.109		218.466	--	--
9.91204	151.284		218.466	--	--
77.3487	--		--	--	--
32.964	10.8214		--	--	--
62.6987	181.564		--	--	--
198.335	11.249		--	--	--
--	24.3256		--	--	--
59.0568	37.5173		--	--	--
116.644	23.9189		--	--	--
115.746	29.3757		--	--	--
244.412	41.2252
86.1447	--
90.8328	83.2297
63.9485	48.1832
--	20.0732
50.2984	31.136
25.4219
55.5252
56.1693
40.6713
--
68.766
47.485
373.864
374.483
--
--
45.1784
37.699
25.2197
88.7765
204.734
80.2205
